# Supplementary material for: Single-molecule long-read sequencing reveals the chromatin basis of gene expression
Source: Genome Res. 2019 Aug;29(8):1329–42. doi: 10.1101/gr.251116.119 (PMC6673713; doi:10.1101/gr.251116.119)
Supplement: Supplemental Material [file supp_gr.251116.119_Supplemental_Table_S5.xlsx]

## Sheet: Table S5
Table S5. Sequences of Sanger sequencing results for verifying methylation efficiency.
Genomic Region (sacCer3, yeast reference genome)	PCR template/Colony ID	Sequence
CHA1 (ChrIII:15713-16074)	CHA1_ChrIII:15713-16074	GTGATATATGAGTAAAATGTATGTAGTACATGTATGAAAATTATCAAGGGCAAATTGATGCTTCAACGAAAAAGTTATTGGATTTTCAAGCACTTTTTAAATTCACAATATTTTTTTCTGGAAATATGAAATTGTCAGCGACTTCTATTACAGGAGTGTCTTTTTTTCTCATGCTATCCAACGCTTCTTCCAAGTCCTTTATAGTATTAGAGGAGCCGCCACAAGCAATAATTATCACAATGTCATCCGCAGCTAATTTTGAGCCCAGTGCATTTTCTAGGATCTTAGTGTTGTAACCCAAATGCAATGCGGCGCCACATGCCGGTTCAATCACCATATTGAATTGATGTGTATATTTAAGA
	Colony 1	NNCANAGGCGCGCGATCGCCCTTGTGATATATGAGTAAAATGTATGTAGTACATGTATGAAAATTATTAAGGGCAAATTGATGCTTTAATGAAAAAGTTATTGGATTTTTAAGCATTTTTTAAATTTATAATATTTTTTTTTGGAAATATGAAATTGTTAGCGATTTTTATTATAGGAGTGTTTTTTTTTTTTATGCTATTTAATGCTTTTTTTGAGTTTTTTATAGTATTAGAGGAGCTGCTATAAGCAATAATTATTATAATGTTATCTGCAGCTAATTTTGAGCTTAGTGCATTTTTTAGGATTTTAGTGTTGTAATTTAAATGTAATGCGGCGCTATATGCTGGTTTAATTGTTATATTGAATTGATGTGTATATTTAAGAAAGGGCGAATTCGT…
	Colony 2	NNCATNAGCGGCGCGATCGCCTTGTGATATATGAGTAAAATGTATGTAGTATATGTATGAAAATTATTAAGGGCAAATTGATGCTTTAATGAAAAAGTTATTGGATTTTTAAGCATTTTTTAAATTTATAATATTTTTTTTTGGAAATATGAAATTGTTAGCGATTTTTATTATAGGAGTGTTTTTTTTTTTTATGCTATTTAATGCTTTTTTTAAGTTCTTTATAGTATTAGAGGAGCTGCTATAAGCAATAATTATTATAATGTTATTTGCAGCTAATTTTGAGCTTAGTGCATTTTTTAGGATTTTAGTGTTGTAATCTAAATGCAATGCGGCGCTATATGCTGGTTTAATTATTATATTGAATTGATGTGTATATTTAAGAAAGGGCGAATTCGT…
	Colony 3	GGNNANNNGCGGNCGCGATCGCCTTGTGATATATGAGTAAAATGTATGTAGTATATGTATGAAAATTATTAAGGGCAAATTGATGCTTTAATGAAAAAGTTATTGGATTTTTAAGCATTTTTTAAATTTATAATATTTTTTTTTGGAAATATGAAATTGTTAGCGATTTTTATTATAGGAGTGTTTTTTTTTTTTATGCTATTTAATGCTTTTTTTAAGTTTTTTATAGTATTAGAGGAGCTGCTATAAGCAATAATTATTATAATGTTATTTGCAGCTAATTTTGAGCTTAGTGCATTTTTTAGGATTTTAGTGTTGTAATTTAAATGCAATGCGGCGCTATATGCTGGTTTAATTATTATATTGAATTGATGTGTATATTTAAGAAAGGGCGAATTC…
CYS3 (ChrI:130966-131117)	CYS3_ChrI:130966-131117	TAACAGAGAGAACTTGGAAAGAGCAGTTGCCGCTTTAGAGAACGCTCAATACGGGTTGGCTTTCTCCTCTGGTTCTGCCACCACCGCCACAATCTTGCAATCGCTTCCTCAGGGCTCCCATGCGGTCTCTATCGGTGATGTGTACGGTGGTA
	Colony 1	GNGCANTAGCGGCGCGAATTCGCCCTTTATAGAGAGAATTTGGAAAGAGCAGTTGCTGCTTTAGAGAATGCTTAATATGGGTTGGCTTTTTTTTTTGGTTTTGCTATCATTGCTATAATTTTGCAATTGCTTTTTTAGGGCTTTTATGCGGTTTTTATTGGTGATGTGTATGGTGGTAAAGGGCGAATTCGTTTAAACCTGCAGGACTAGTCCCTTTAGTGAGGGTTAATTCTGAGCTTGGCGTAATCATGGTCATAGCTGTTTCCTGTGTGAAATTGTTATCCGCTCACAATTCCACACAACATACGAGCCGGAAGCATAAAGTGTAAAGCCTGGGGTGCCTAATGAGTGAGCTAACTCACATTAATTGCGTTGCGCTCACTGCCCGCTTTCCAGTCG…
	Colony 2	NNGNATAGCGGCCGCGATTCGCCCTTTATAGAGAGAATTTGGAAAGAGCAGTTGCTGCTTTAGAGAACGCTTAATATGGGTTGGCTTTTTTTTTTGGTTTTGCTATTATCGCTATAATTTTGCAATCGCTTTTTTAGGGCTTTCATGCGGTTTTTATTGGTGATGTGTATGGTGGTAAAGGGCGAATTCGTTTAAACCTGCAGGACTAGTCCCTTTAGTGAGGGTTAATTCTGAGCTTGGCGTAATCATGGTCATAGCTGTTTCCTGTGTGAAATTGTTATCCGCTCACAATTCCACACAACATACGAGCCGGAAGCATAAAGTGTAAAGCCTGGGGTGCCTAATGAGTGAGCTAACTCACATTAATTGCGTTGCGCTCACTGCCCGCTTTCCAGTCGG…
	Colony 3	NNNATNGGCGGCGCGATCGCCCTTTATAGAGAGAATTTGGAAAGAGCAGTTGCTGCTTTAGAGAATGCTTAATATGGGTTGGCTTTTTTTTTTGGTTTTGCTATTATCGCTATAATTTTGCAATTGCTTTTTTAGGGCTTTTATGCGGTTTTTATTGGTGATGTGTATGGTGGTAAAGGGCGAATTCGTTTAAACCTGCAGGACTAGTCCCTTTAGTGAGGGTTAATTCTGAGCTTGGCGTAATCATGGTCATAGCTGTTTCCTGTGTGAAATTGTTATCCGCTCACAATTCCACACAACATACGAGCCGGAAGCATAAAGTGTAAAGCCTGGGGTGCCTAATGAGTGAGCTAACTCACATTAATTGCGTTGCGCTCACTGCCCGCTTTCCAGTCGGGA…
GAL10 (ChrII:278464-278738)	PHO5_ChrII:278464-278738	TATATGTTGTGGAAATGTAAAGAGCCCCATTATCTTAGCCTAAAAAAACCTTCTCTTTGGAACTTTCAGTAATACGCTTAACTGCTCATTGCTATATTGAAGTACGGATTAGAAGCCGCCGAGCGGGCGACAGCCCTCCGACGGAAGACTCTCCTCCGTGCGTCCTCGTCTTCACCGGTCGCGTTCCTGAAACGCAGATGTGCCTCGCGCCGCACTGCTCCGAACAATAAAGATTCTACAATACTAGCTTTTATGGTTATGAAGAGGAAAAATTGG
	Colony 1	NNCNTAGCGCGCGATCGCCTTTATATGTTGTGGAATGTAAAGAGCTTTATTATTTTAGCTTAAAAAAATTTTTTTTTTGGAATTTTTAGTAATATGCTTAATTGCTTATTGCTATATTGAAGTATGGATTAGAAGCTGCTGAGCGGGCGATAGCTTTTTGATGGAAGATTTTTTTTTGTGCGTTTTTGTTTTTATTGGTTGCGTTTTTGAAATGCAGATGTGCTTTGTGCTGCATTGCTTTGAATAATAAAGATTTTATAATATTAGCTTTTATGGTTATGAAGAGGAAAAATTGGAAGGGCGAATTCGTTTAAACCTGCAGGACTAGTCCCTTTAGTGAGGGTTAATTCTGAGCTTGGCGTAATCATGGTCATAGCTGTTTCCTGTGTGAAATTGTTA…
	Colony 2	GTNNAGCGGCGCGATCGCCCTTTATATGTTGTGGAATGTAAAGAGCTCTATTATTTTAGCTTAAAAAAATCTTTTTTTTGGAACTTTTAGTAATATGCTTAATTGCTTATTGCTATATTGAAGTATGGATTAGAAGCTGCTGAGCGGGCGATAGCTCTTTGATGGAAGATTTTTTTTGTGCGTTTTTGTCTTTATTGGTTGCGTTTTTGAAATGCAGATGTGCTTTGCGCTGCATTGCTTTGAATAATAAAGATTTTATAATATTAGCTTTTATGGTTATGAAGAGGAAAAATTGGAAGGGCGAATTCGTTTAAACCTGCAGGACTAGTCCCTTTAGTGAGGGTTAATTCTGAGCTTGGCGTAATCATGGTCATAGCTGTTTCCTGTGTGAAATTGTTA…
	Colony 3	NNGGAATAGCGGCGCGATCGCCCTTTATATGTTGTGGAATGTAAAGAGCTTTATTATTTTAGCTTAAAAAAATCTTTTTTTTGGAATTTTTAGTAATATGCTTAATTGCTTATTGCTATATTGAAGTATGGATTAGAAGCTGCTGAGCGGGCGATAGCTTTTTGATGGAAGATTTTTTTTTGGGCGTTTTTGTTTTTATGGGTTGCGTTTTTGAAATGCAAATGTGCTTTGCGCTGCATTGCTTTGAATAATAAAAATTTTATAATATTACCTTTTATGGTTATGAAAAGGAAAAATGGGAAGGGCAAATTCGTTTAAACCTGCAGGACTAGTCCCTTTAGGGAGGGTTAATTCTGACCTGGGCGTAATCAGGGTCATAGCTGTTTCCGGGGTGAAATT…
PHO5 (ChrII:430248-430388)	PHO5_ChrII:430248-430388	AAGTAGGTTGTGTCGTATTCATTTACAATGTCATCATTGGCATCGTAGTCCCAAGCAGGACATGAGTTACAAGCACTCAAAGTGTTGGCACCAGCGGATTCAGCTTCACTGACAGTCTGCAAGGTGATGTTGAATTGGTCA
	Colony 1	NNANNAAGCGGCGCGATTCGCCCTTAGTAGGTTGTGTTGTATTTATTTATAATGTTATTATTGGCATTGTAGTTTTAAGCAGGATATGAGTTATAAGCATTTAAAGTGTTGGCATCAGCGGATTTAGCTTTATTGATAGTTTGCAAGGTGATGTTGAATTGGTTAAAGGGCGAATTCGTTTAAACCTGCAGGACTAGTCCCTTTAGTGAGGGTTAATTCTGAGCTTGGCGTAATCATGGTCATAGCTGTTTCCTGTGTGAAATTGTTATCCGCTCACAATTCCACACAACATACGAGCCGGAAGCATAAAGTGTAAAGCCTGGGGTGCCTAATGAGTGAGCTAACTCACATTAATTGCGTTGCGCTCACTGCCCGCTTTCCAGTCGGGAAACCTGTCGT…
	Colony 2	GNNAATNGCGGGCGCGATCGCCCTTANTAGGTTGTGTTGTATTTATTTATAATGTTATTATTGGCATTGTAGTTTTAAGCAGGATATGAGTTATAAGCATTTAAAGTGTTGGCATCAGCGGATTTAGCTTTATTGATAGTTTGCAAGGTGATGTTGAATTGGTTAAAGGGCGAATTCGTTTAAACCTGCAGGACTAGTCCCTTTAGTGAGGGTTAATTCTGAGCTTGGCGTAATCATGGTCATAGCTGTTTCCTGTGTGAAATTGTTATCCGCTCACAATTCCACACAACATACGAGCCGGAAGCATAAAGTGTAAAGCCTGGGGTGCCTAATGAGTGAGCTAACTCACATTAATTGCGTTGCGCTCACTGCCCGCTTTCCAGTCGGGAAACCTGTCGT…
	Colony 3	NNNTNNNGCGGCGCGATCGCCCTTAGTAGGTTGTGTTGTATTTATTTATAATGTTATTATTGGCATTGTAGTTTTAAGCAGGATATGAGTTATAAGCATTTAAAGTGTTGGCATTAGCGGATTTAGCTTTATTGATAGTTTGCAAGGTGATGTTGAATTGGTTAAAGGGCGAATTCGTTTAAACCTGCAGGACTAGTCCCTTTAGTGAGGGTTAATTCTGAGCTTGGCGTAATCATGGTCATAGCTGTTTCCTGTGTGAAATTGTTATCCGCTCACAATTCCACACAACATACGAGCCGGAAGCATAAAGTGTAAAGCCTGGGGTGCCTAATGAGTGAGCTAACTCACATTAATTGCGTTGCGCTCACTGCCCGCTTTCCAGTCGGGAAACCTGTCGTG…
PHO5 (ChrII:430843-431498)	PHO5_ChrII:430843-431498	TAAGGATTTGAAAGTTGTATTTAATAAGAATGCGCAAATATGTTAATGTATTTGGAAGTTATTTTATGTGTGTTGTTTTAATGTTTTTTTATGTAAGTGGATGTTGTTTATAAATTTTAAATGAAGGTAAAAGGTTTATAGTGTTTTTTTTTTGTTTGCATAAAGAAATATATATTAAATTAGCATGTTTTTGCATAGAATGCAATTGCATAATGCTAAAAAAAGTAAAAGTGATTAAAAGAGTTAATTGAATAGGCAATTTTTAAATGAATTGATATAATTTTGGTATTTATATGTGGGATTAGTATAGATTAAATTTATGATTTTGGTTTTTGTTTTTGAAGAGATTGTATATGTTAAATTATTAAATTGGTTATTTTATTTGGCAAGGCATATATC…
	Colony 1	NNNNNTNGCGGCGCGATTCGCCCTTTTATGAGAATAAGAATAATAATAAATAGAGTAAGTAAATTTGAGATTATTAATGTTTAAATTTGTTGTTTATTTAATTTTAGTTGTTTTTTTGGTCAATGTAGGTATTATTTTTTTAGGTAAATTAGTTGATGTTGATAAGATTGGTATTTAAAAAGATAAGGGCGAATTCGTTTAAACCTGCAGGACTAGTCCCTTTAGTGAGGGTTAATTCTGAGCTTGGCGTAATCATGGTCATAGCTGTTTCCTGTGTGAAATTGTTATCCGCTCACAATTCCACACAACATACGAGCCGGAAGCATAAAGTGTAAAGCCTGGGGTGCCTAATGAGTGAGCTAACTCACATTAATTGCGTTGCGCTCACTGCCCGCTTTC…
	Colony 2	NNNATNNCGGCGCGATTCGCCTTTTATGAGAATAAGAATAATAATAAATAGAGTAAGTAAATTTGAGATTATTAATGTTTAAATTTGTTGTTTATTTAATTTTAGTTGTTTTTTTGGTTAATGTAGGTATTATTTTTTTAGGTAAATTAGTTGATGTTGATAAGATTGGTATTTAAAAAGATAAGGGCGAATTCGTTTAAACCTGCAGGACTAGTCCCTTTAGTGAGGGTTAATTCTGAGCTTGGCGTAATCATGGTCATAGCTGTTTCCTGTGTGAAATTGTTATCCGCTCACAATTCCACACAACATACGAGCCGGAAGCATAAAGTGTAAAGCCTGGGGTGCCTAATGAGTGAGCTAACTCACATTAATTGCGTTGCGCTCACTGCCCGCTTTCCA…
	Colony 3	GNNNNNNGCGCGCGATCGCCCTTTTATGAGAATAAGAATAATAATAAATAGAGTAAGTAAATTTGAGATTATTAATGTTTAAATTTGTTGTTTATTTAATTTTAGTTGTTTTTTTGGTTAATGTAGGTATTATTTTTTTAGGTAAATTAGTTGATGTTGATAAGATTGGTATTTAAAAAGATAAGGGCGAATTCGTTTAAACCTGCAGGACTAGTCCCTTTAGTGAGGGTTAATTCTGAGCTTGGCGTAATCATGGTCATAGCTGTTTCCTGTGTGAAATTGTTATCCGCTCACAATTCCACACAACATACGAGCCGGAAGCATAAAGTGTAAAGCCTGGGGTGCCTAATGAGTGAGCTAACTCACATTAATTGCGTTGCGCTCACTGCCCGCTTTCCA…
	Colony 4	NNCATNGCGGCGCGATCGCCCTTATCTTTTTAATACCAATCTTATCAACATCAACTAATTTACCTAAAAAAATAATACCTACATTAACCAAAAAAACAACTAAAATTAAATAAACAACAAATTTAAACATTAATAATCTCAAATTTACTTACTCTATTTATTATTATTCTTATTCTCATAAAAGGGCAAATTCTTTTAAACCTGCAGGACTAGCCCCTTTATTGAGGGTTAATTCTGAGCTGGGCGTATTCATGGCCATAGCTGTTTCCGGGGTGAAATTGTTATCCGCTCACAATTCCACACAACATACAAGCCGAAAGCATAAAGGGTAAAGCCGGGGGGGCCTATGGAGGGAGCTAACTCACATTAATGGCGTTGCGCTCACGGCCCGCTTTCCAG…
	Colony 5	NNNNNNGNNGCGCGATTCGCCCTTATATAATAAATAGAGTAAGTAAATTTGAGATTATTAATGTTTAAATTTGTTGTTTATTCAATTTTAGCTGCTTTTTTGGCTAATGCAGGTATCATTTCTTTAGGCAAATTAGCTGATGTTGATAAGATTGGTATTTAAAAAGATAAGGGCGAATTCGTTTAAACCTGCAGGACTAGTCCCTTTAGTGAGGGTTAATTCTGAGCTTGGCGTAATCATGGTCATAGCTGTTTCCTGTGTGAAATTGTTATCCGCTCACAATTCCACACAACATACGAGCCGGAAGCATAAAGTGTAAAGCCTGGGGTGCCTAATGAGTGAGCTAACTCACATTAATTGCGTTGCGCTCACTGCCCGCTTTCCAGTCGGGAAACCTGT…
	Colony 6	NNNANAGCGGCGCGATTCGCCCTTATCTTTTTAATACCAATCTTATCAACATCAACTAATTTACCTAAAAAAATAATACCTACATTAACCAAAAAAACAACTAAAATTAAATAAACAACAAATTTAAACATTAATAATCTCAAATTTACTTACTCTATTTATTATTATTCTTATTCTCATAAAAGGGCGAATTCGTTTAAACCTGCAGGACTAGTCCCTTTAGTGAGGGTTAATTCTGAGCTTGGCGTAATCATGGTCATAGCTGTTTCCTGTGTGAAATTGTTATCCGCTCACAATTCCACACAACATACGAGCCGGAAGCATAAAGTGTAAAGCCTGGGGTGCCTAATGAGTGAGCTAACTCACATTAATTGCGTTGCGCTCACTGCCCGCTTTCCA…
	Colony 7	NNNNNANNNNGGCGCGATTCGCCTTATCTTTTTAATACCAATCTTATCAACATCAACTAATTTACCTAAAAAAATAATACCTACATTAGCCAAAAAAGCAGCTAAAATTAAATAAACAACAAATTTAAACATTAATAATCTCAAATTTACTTACTCTATTTATTATTATTCTTATTCTCATAAAAGGGCGAATTCGTTTAAACCTGCAGGACTAGTCCCTTTAGTGAGGGTTAATTCTGAGCTTGGCGTAATCATGGTCATAGCTGTTTCCTGTGTGAAATTGTTATCCGCTCACAATTCCACACAACATACGAGCCGGAAGCATAAAGTGTAAAGCCTGGGGTGCCTAATGAGTGAGCTAACTCACATTAATTGCGTTGCGCTCACTGCCCGCTTTCC…
	Colony 8	NNNNATNNGCGGCGCGATTCGCCCTTTTATGAGAATAAGAATAATAATAAATAGAGTAAGTAAATTTGAGATTATTAATGTTTAAATTTGTTGTTTATTTAATTTTAGTTGTTTTTTTGGTTAATGTAGGTATTATTTTTTTAGGTAAATTAGTTGATGTTGATAAGATTGGTATTTAAAAAGATAAGGGCGAATTCGTTTAAACCTGCAGGACTAGTCCCTTTAGTGAGGGTTAATTCTGAGCTTGGCGTAATCATGGTCATAGCTGTTTCCTGTGTGAAATTGTTATCCGCTCACAATTCCACACAACATACGAGCCGGAAGCATAAAGTGTAAAGCCTGGGGTGCCTAATGAGTGAGCTAACTCACATTAATTGCGTTGCGCTCACTGCCCGCTTT…
	Colony 9	CNNNNNNNNNNNGNGNGGGGATGGGCGTTAGCTGTTGAGTAGCGATCTTATGACGTGGGCTAATTTGCCTAAAAAAATAATAGCTACATTAGCCAAAAAAACAACTAAAATTAAATGAACAACAAATTTAAACGTTAATAATGTCAAATTTACTTACTCTGTTTATTATTATTCTTATTCTCATAAAAGGGCGAATTCGTTTAAACCTGGGGGACTAGTCCCTTTAGTGAGGGTTAATTCTGAGCTTGGCGTAATCGTGGTCATAGCTGTTTCCTGTGTGAAATTGTTATCCGCTCACAATTCCACACAACATACGAGCCGGAAGCATAAAGTGTAAAGCCTGGGGTGCCTAATGAGTGAGCTAACTCACATTAATTGCGTTGCGCTCACTGCCCGCTT…
	Colony 10	NNGNNNNAGCGGCGGCGATTCGCCCTTTTATGAGAATAAGAATAATAATAAATAGAGTAAGCAAATTTGAGATTATCAATGTTTAAATTTGTTGTTTATTTAATTTTAGCTGCTTTTTTGGCTAATGCAGGTATTATTCTCTTAGGCAAATTAGCTGATGTTGATAAGATTGGTATTTAAAAAGATAAGGGCGAATTCGTTTAAACCTGCAGGACTAGTCCCTTTAGTGAGGGTTAATTCTGAGCTTGGCGTAATCATGGTCATAGCTGTTTCCTGTGTGAAATTGTTATCCGCTCACAATTCCACACAACATACGAGCCGGAAGCATAAAGTGTAAAGCCTGGGGTGCCTAATGAGTGAGCTAACTCACATTAATTGCGTTGCGCTCACTGCCCGCTT…
Note: To verify the efficiency of M.CviPI methylation on positive control and target samples. Bisulfite treatment plus Sanger sequencing were used. Firstly, bisulfite conversion was performed using EZ DNA Methylation Lighting Kit (Zymo Research). Secondly, PCR amplification targeted to specific genomic regions using ZymoTaq PreMix (Zymo Research). Thirdly, TA cloning was performed by TOPO TA Clon…
